# Supplementary material for: Great advance in high Tc for hybrid photoelectric-switch bulk/film coupled with dielectric and blue-white light
Source: Royal Society of Chemistry journal article supplement (doi:10.1039/c9tc03338f), 2019-01-01
Supplement: c9tc03338f1.pdf [file c9tc03338f1.pdf]

## Supporting Information

### Great advance in high $T_c$ for hybrid photoelectric-switch bulk/film coupled with dielectric and blue-white light

*Ya-Fang Gao, Tie Zhang, Wan-Ying Zhang, Qiong Ye,\* and Da-Wei Fu\**

(Ordered Matter Science Research Center, Jiangsu Key Laboratory for Science and Applications of Molecular Ferroelectrics, Southeast University, Nanjing, 211189, P.R. China)

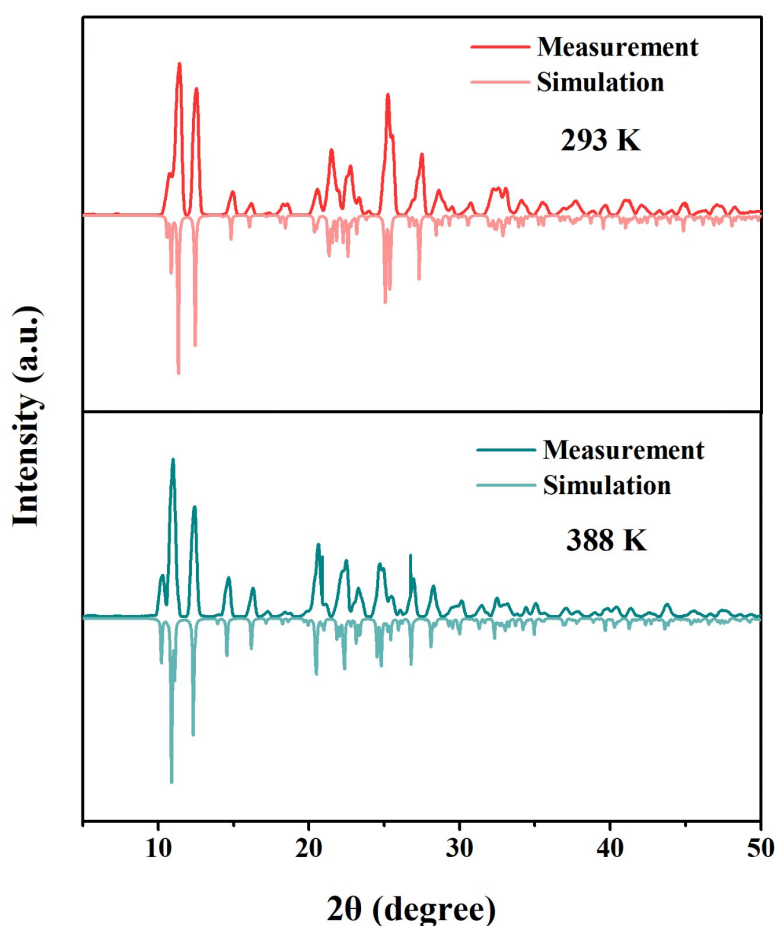

**Fig. S1** The powder X-ray diffraction (PXRD) pattern for compound 1 at 293K and 388K.

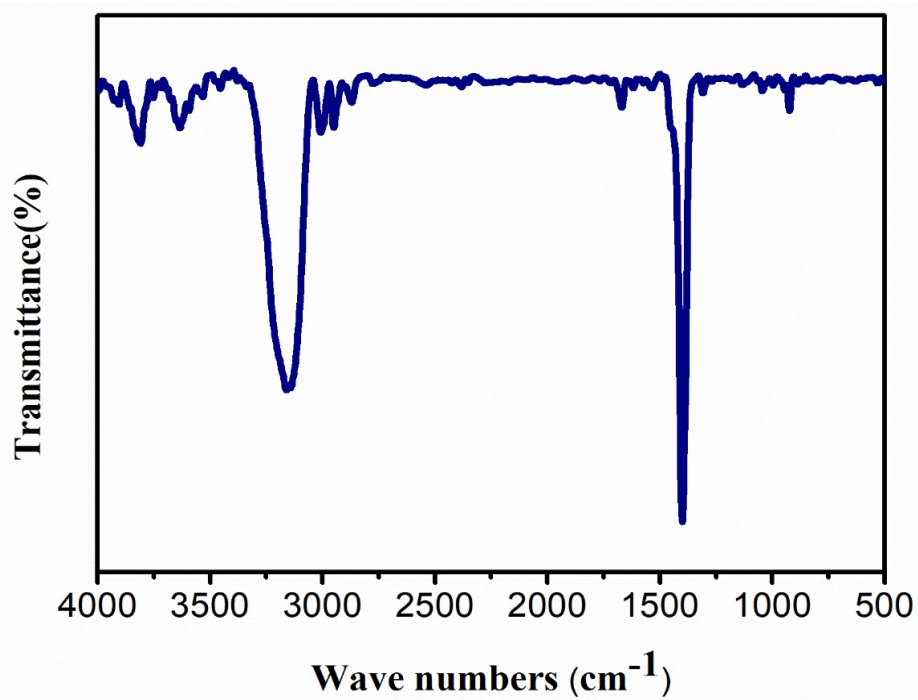

**Fig. S2** The IR spectrum of compound 1

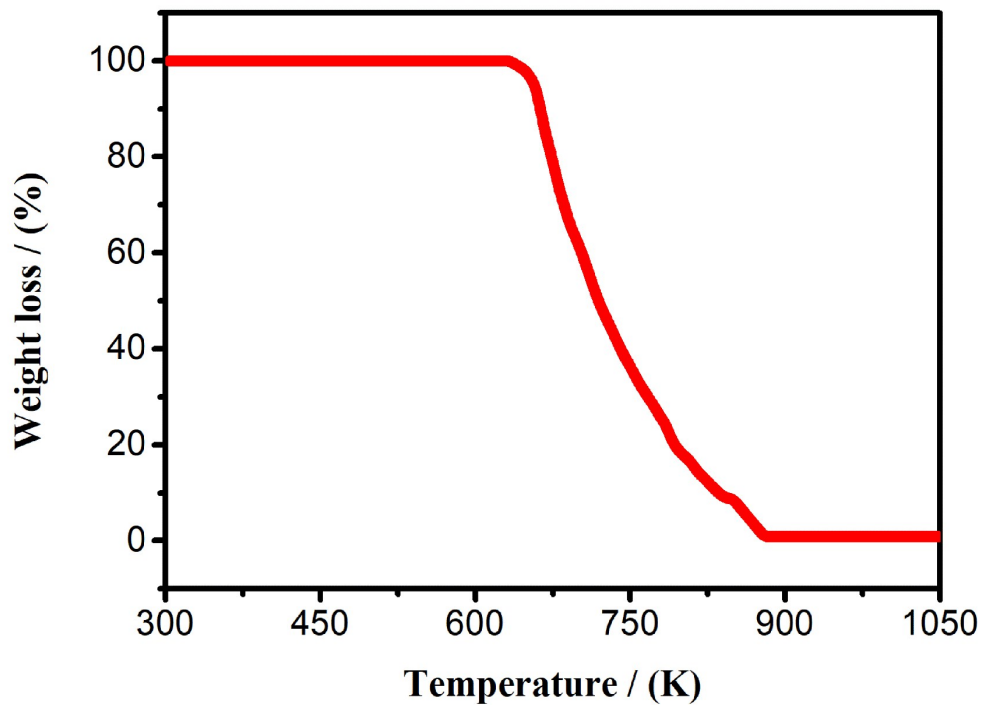

**Fig. S3** TG curve of crystalline sample 1

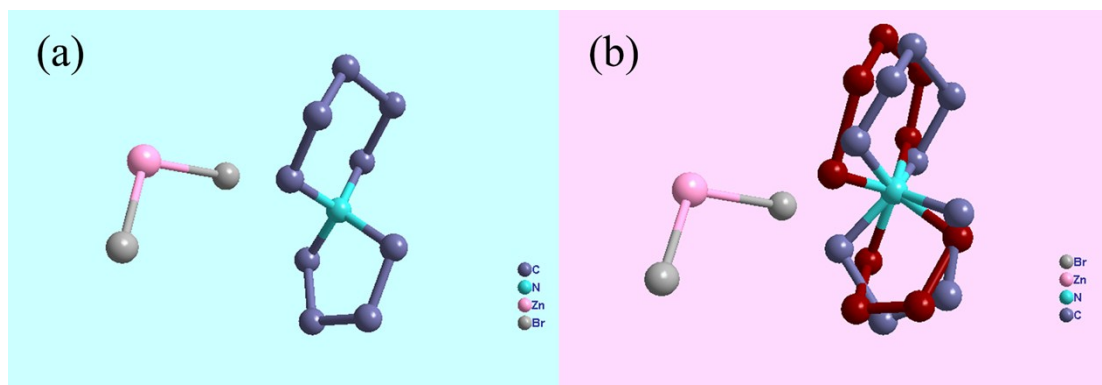

**Fig. S4** The asymmetric unit of compound **1** at 293K (a) and 388K (b).

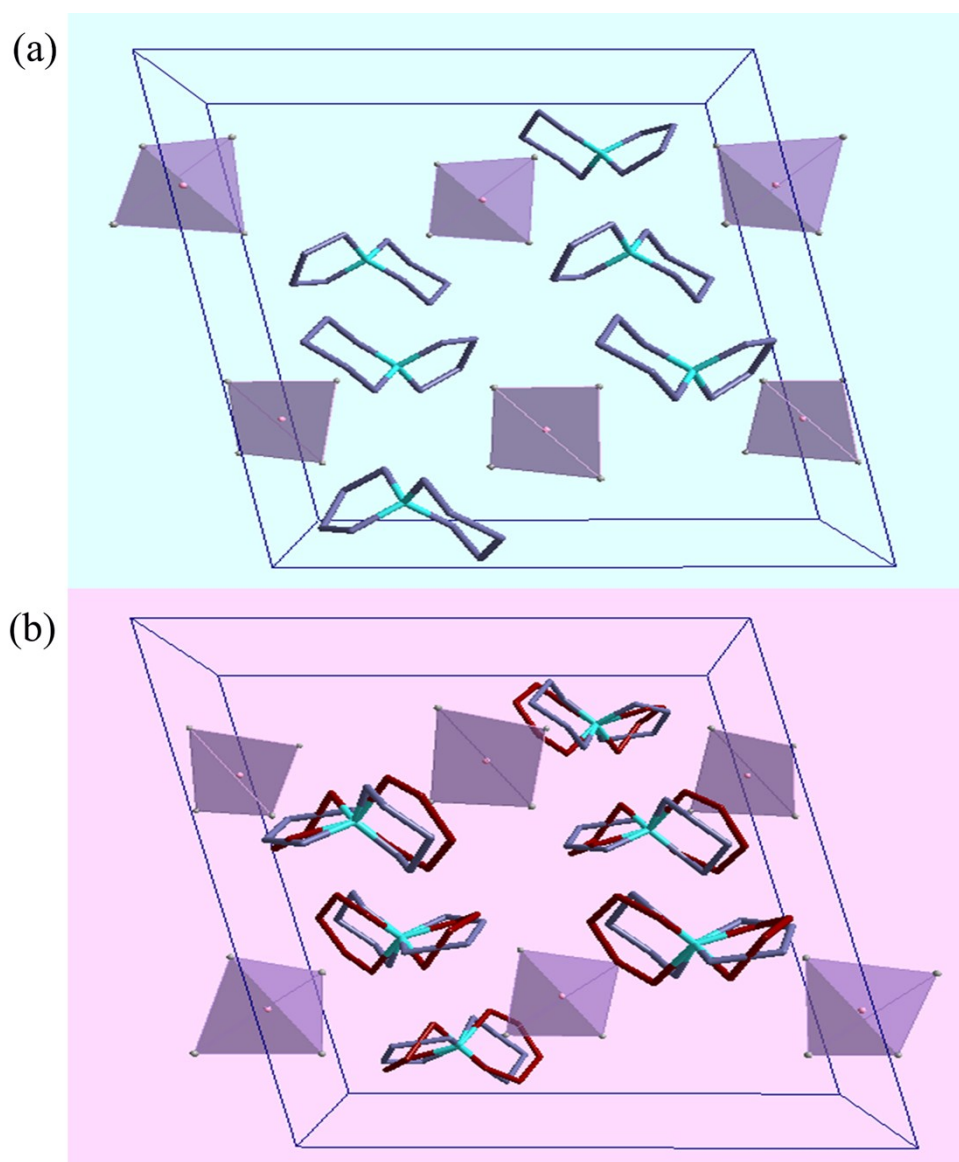

**Fig. S5** Cell packing diagrams of **1** at RTP (a) and HTP (b).

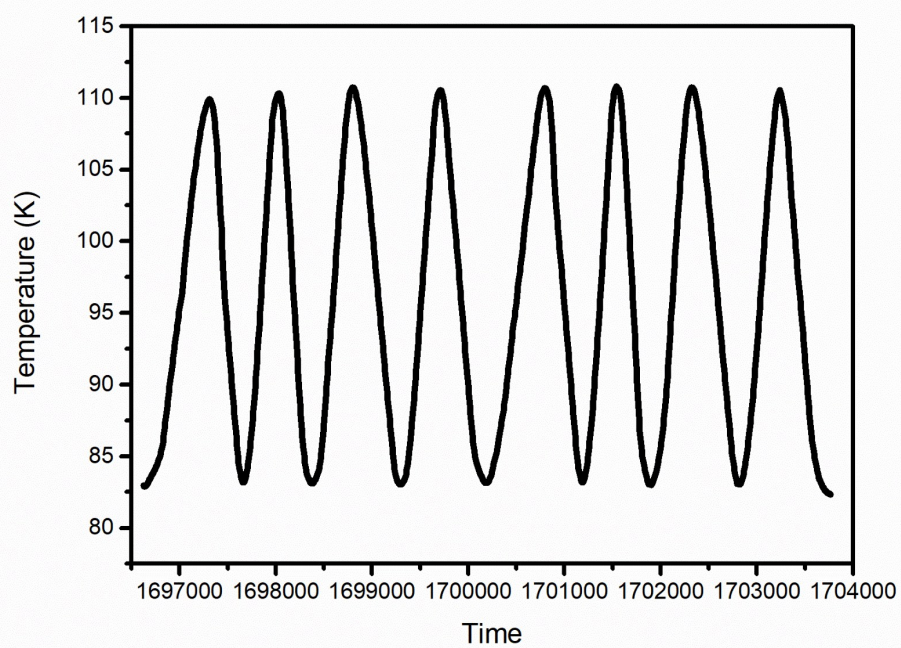

**Fig. S6** The recoverable switching diagram of temperature curve over time.

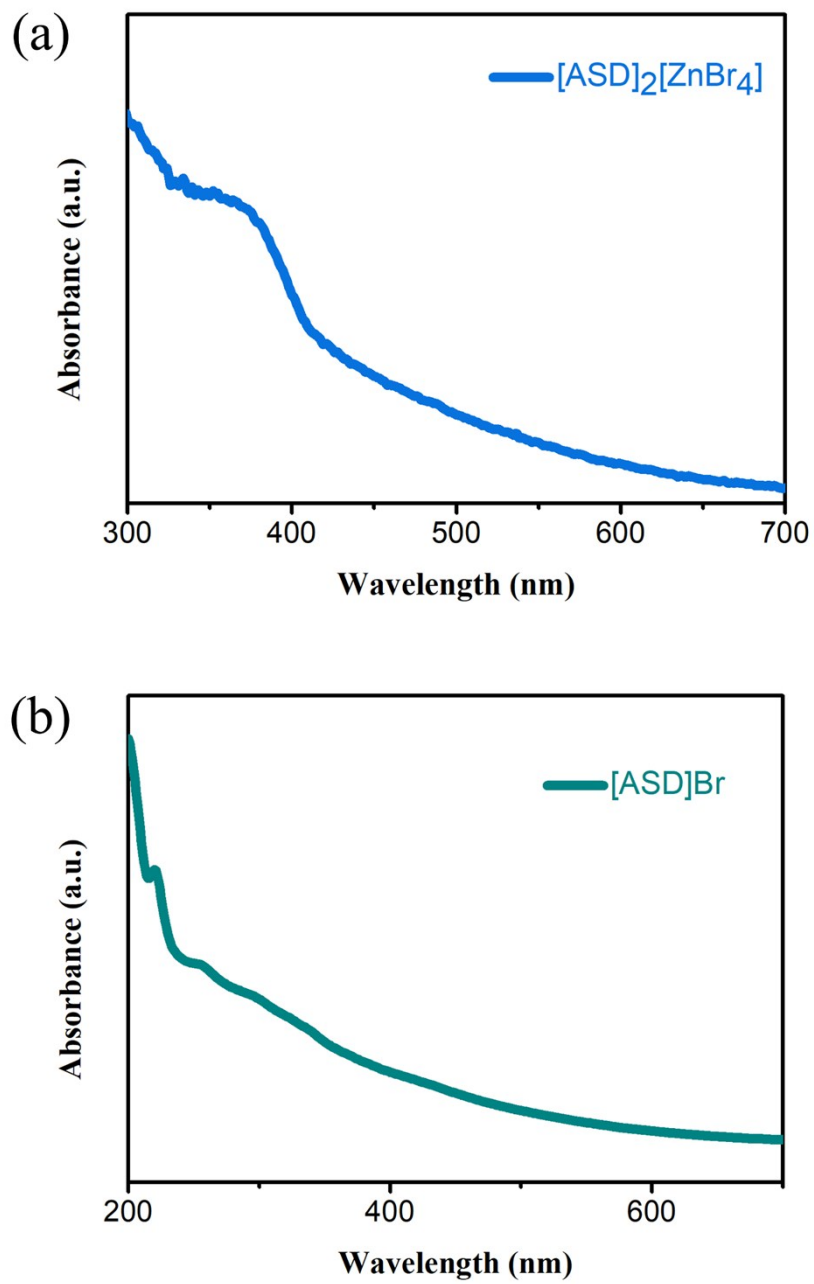

**Fig. S7** The UV absorption spectra of  $[\text{ASD}]_2[\text{ZnBr}_4]$  (a) and  $[\text{ASD}]\text{Br}$  (b).

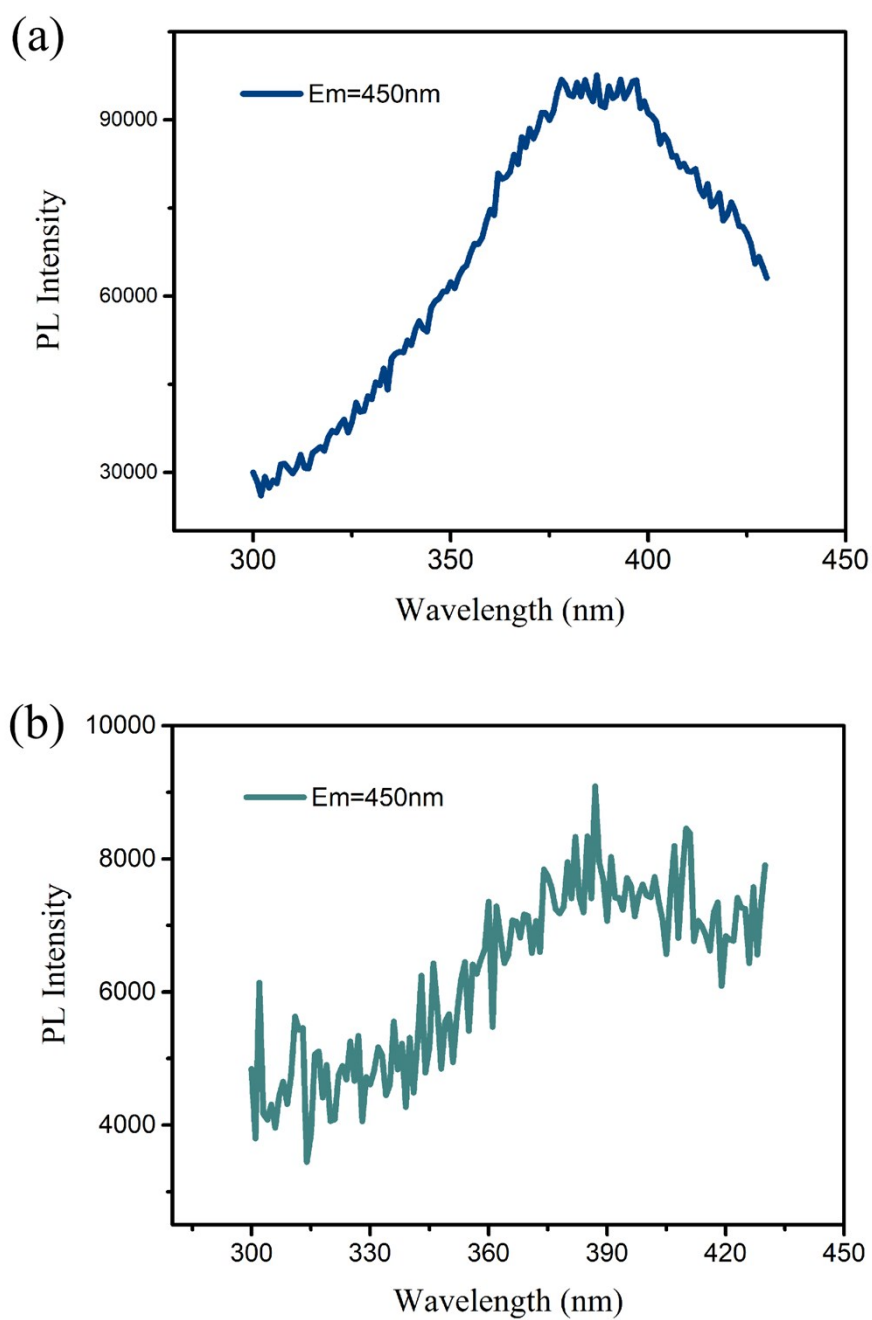

**Fig. S8** The excitation spectra of the bulk crystal (a) and grinded powder (b) of the compound **1**.



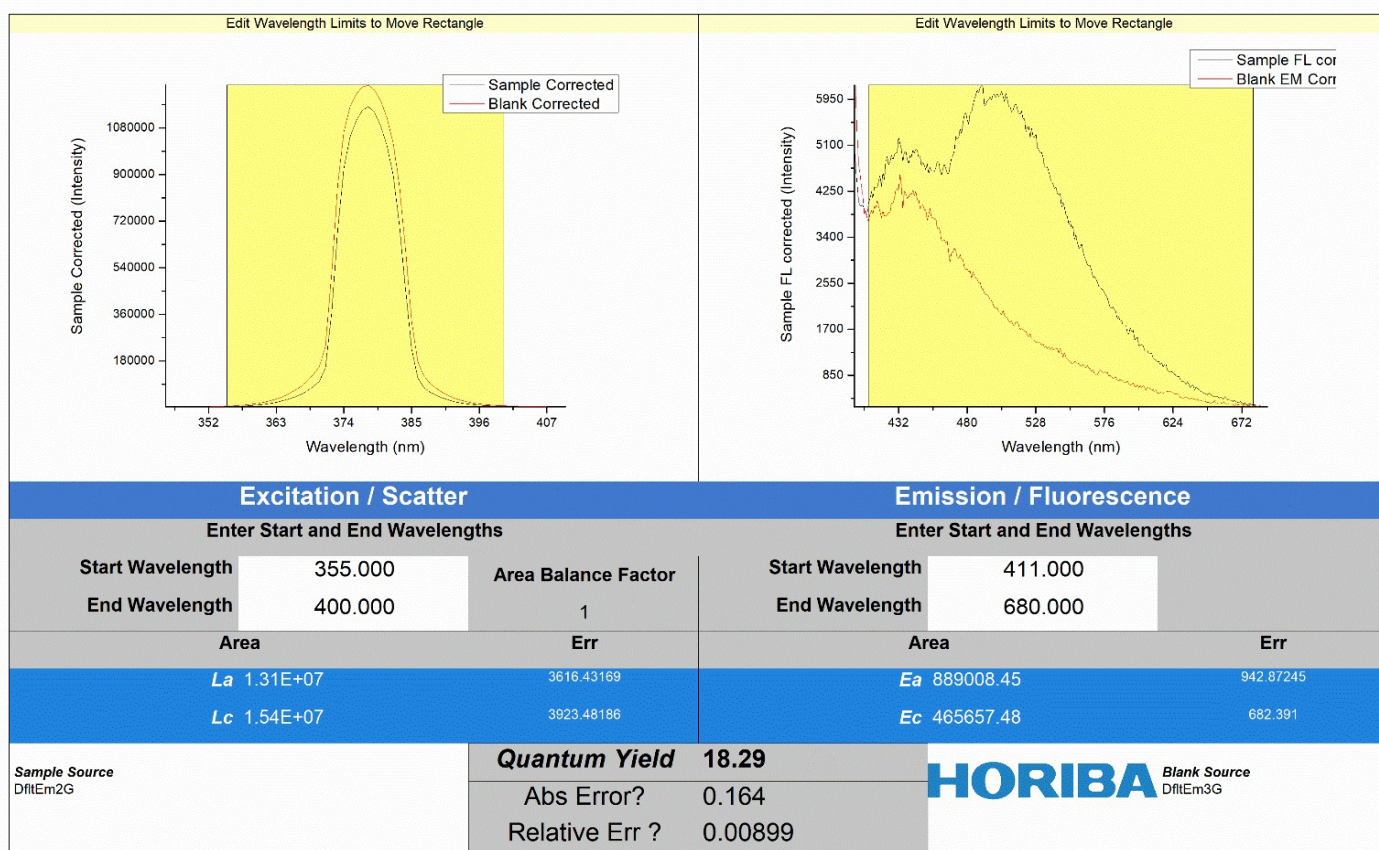

**Fig. S9** The quantum yield plot of  $[\text{ASD}]_2[\text{ZnBr}_4]$  (**1**)

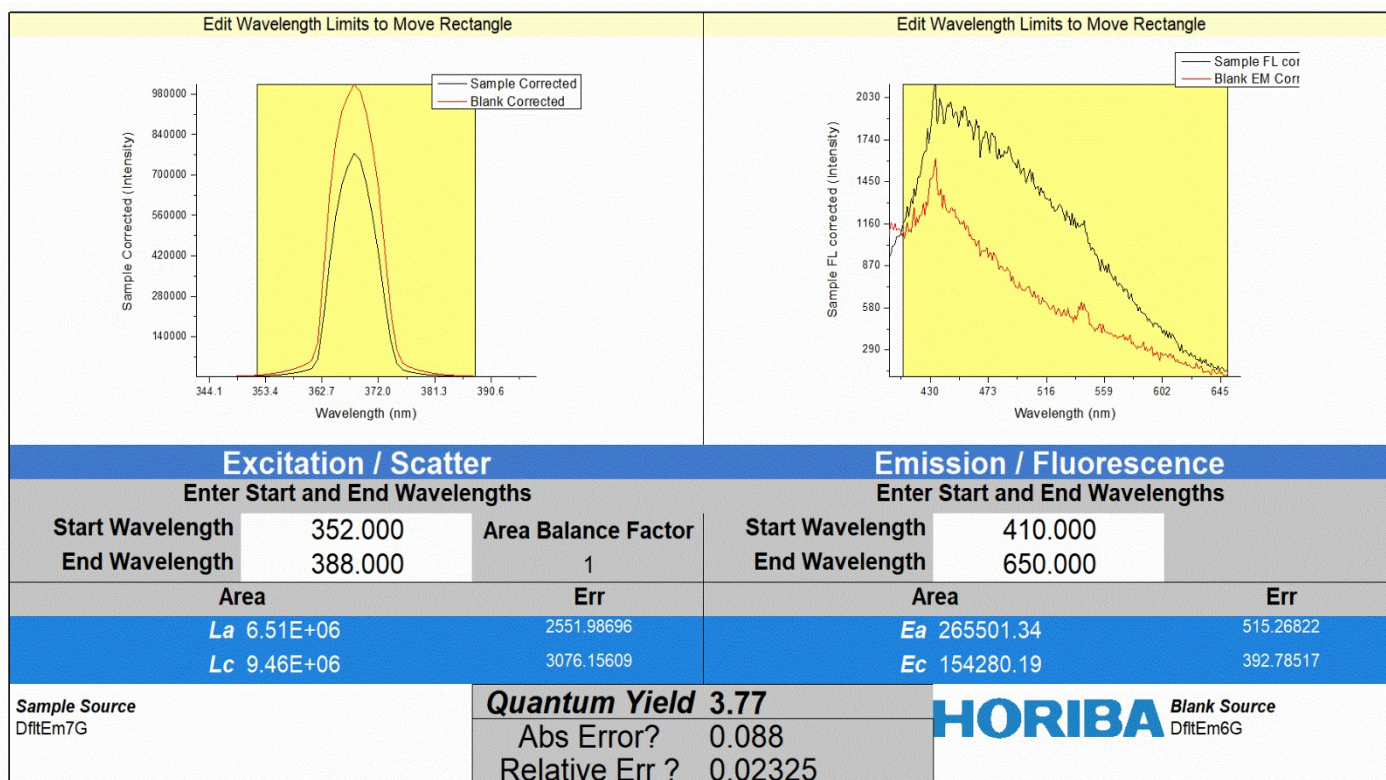

**Fig. S10** The quantum yield plot of [ASD]Br



**Table S1.** Crystal data and structure refinements for **1** at 293K and 388K

|                                        | RTP(293K)                                                        | HTP(388K)                                                        |
|----------------------------------------|------------------------------------------------------------------|------------------------------------------------------------------|
| Empirical formula                      | C <sub>18</sub> H <sub>36</sub> N <sub>2</sub> ZnBr <sub>4</sub> | C <sub>18</sub> H <sub>36</sub> N <sub>2</sub> ZnBr <sub>4</sub> |
| Formula weight                         | 665.50                                                           | 665.50                                                           |
| Temperature(K)                         | 293                                                              | 388                                                              |
| Crystal system                         | Monoclinic                                                       | Monoclinic                                                       |
| Space group                            | C2/c                                                             | C2/c                                                             |
| a/Å                                    | 14.5026(5)                                                       | 14.6305(11)                                                      |
| b/Å                                    | 10.3056(3)                                                       | 10.9175(6)                                                       |
| c/Å                                    | 16.6021(6)                                                       | 16.4244(10)                                                      |
| Volume/Å <sup>3</sup>                  | 2432.81(14)                                                      | 2545.7(3)                                                        |
| Z                                      | 4                                                                | 4                                                                |
| Radiation type                         | Mo-K $\alpha$                                                    | Mo-K $\alpha$                                                    |
| Absorption correction                  | Semi-empirical                                                   | Semi-empirical                                                   |
| D <sub>calc</sub> / g cm <sup>-3</sup> | 1.817                                                            | 1.736                                                            |
| F(000)                                 | 1312.0                                                           | 1312.0                                                           |
| GOF                                    | 1.031                                                            | 1.069                                                            |
| R1[I > 2 $\sigma$ (I)]                 | 0.0247                                                           | 0.0438                                                           |
| wR2[I > 2 $\sigma$ (I)]                | 0.0557                                                           | 0.1539                                                           |

**Table S2.** Selected bond lengths [Å] and angles [°] for **1** at 293K and 388K

|                 | 293K                                   |             | 388K                                     |             |
|-----------------|----------------------------------------|-------------|------------------------------------------|-------------|
| Bond length (Å) | Zn1—Br1                                | 2.4172(4)   | Zn1—Br1                                  | 2.4010(5)   |
|                 | Zn1—Br2                                | 2.4105(4)   | Zn1—Br2                                  | 2.4142(4)   |
|                 | Zn1—Br1 <sup>i</sup>                   | 2.4172(4)   | Zn1—Br1 <sup>ii</sup>                    | 2.4010(5)   |
|                 | Zn1—Br2 <sup>i</sup>                   | 2.4105(4)   | Zn1—Br2 <sup>ii</sup>                    | 2.4142(4)   |
| Bond angle (°)  | Br1—Zn1—Br1 <sup>i</sup>               | 109.37(3)   | Br1—Zn1—Br1 <sup>ii</sup>                | 109.92(3)   |
|                 | Br1—Zn1—Br2                            | 112.513(12) | Br1—Zn1—Br2                              | 107.902(13) |
|                 | Br1—Zn1—Br2 <sup>i</sup>               | 106.806(12) | Br1—Zn1—Br2 <sup>ii</sup>                | 111.337(14) |
|                 | Br2—Zn1—Br1 <sup>i</sup>               | 106.806(12) | Br2—Zn1—Br1 <sup>ii</sup>                | 111.337(14) |
|                 | Br2 <sup>i</sup> —Zn1—Br1 <sup>i</sup> | 112.513(12) | Br2 <sup>ii</sup> —Zn1—Br1 <sup>ii</sup> | 107.902(13) |
|                 | Br2—Zn1—Br2 <sup>i</sup>               | 108.92(3)   | Br2—Zn1—Br2 <sup>ii</sup>                | 108.46(2)   |

Symmetry codes: (i)  $-x, y, -z+1/2$ ; (ii)  $-x+1, y, -z-1/2$ .
